# Supplementary material
Source: PubMed Central journal article supplement (PMC2519537)
Supplement: supp_190_17_5963__1.pdf [file supp_190_17_5963__1.pdf]

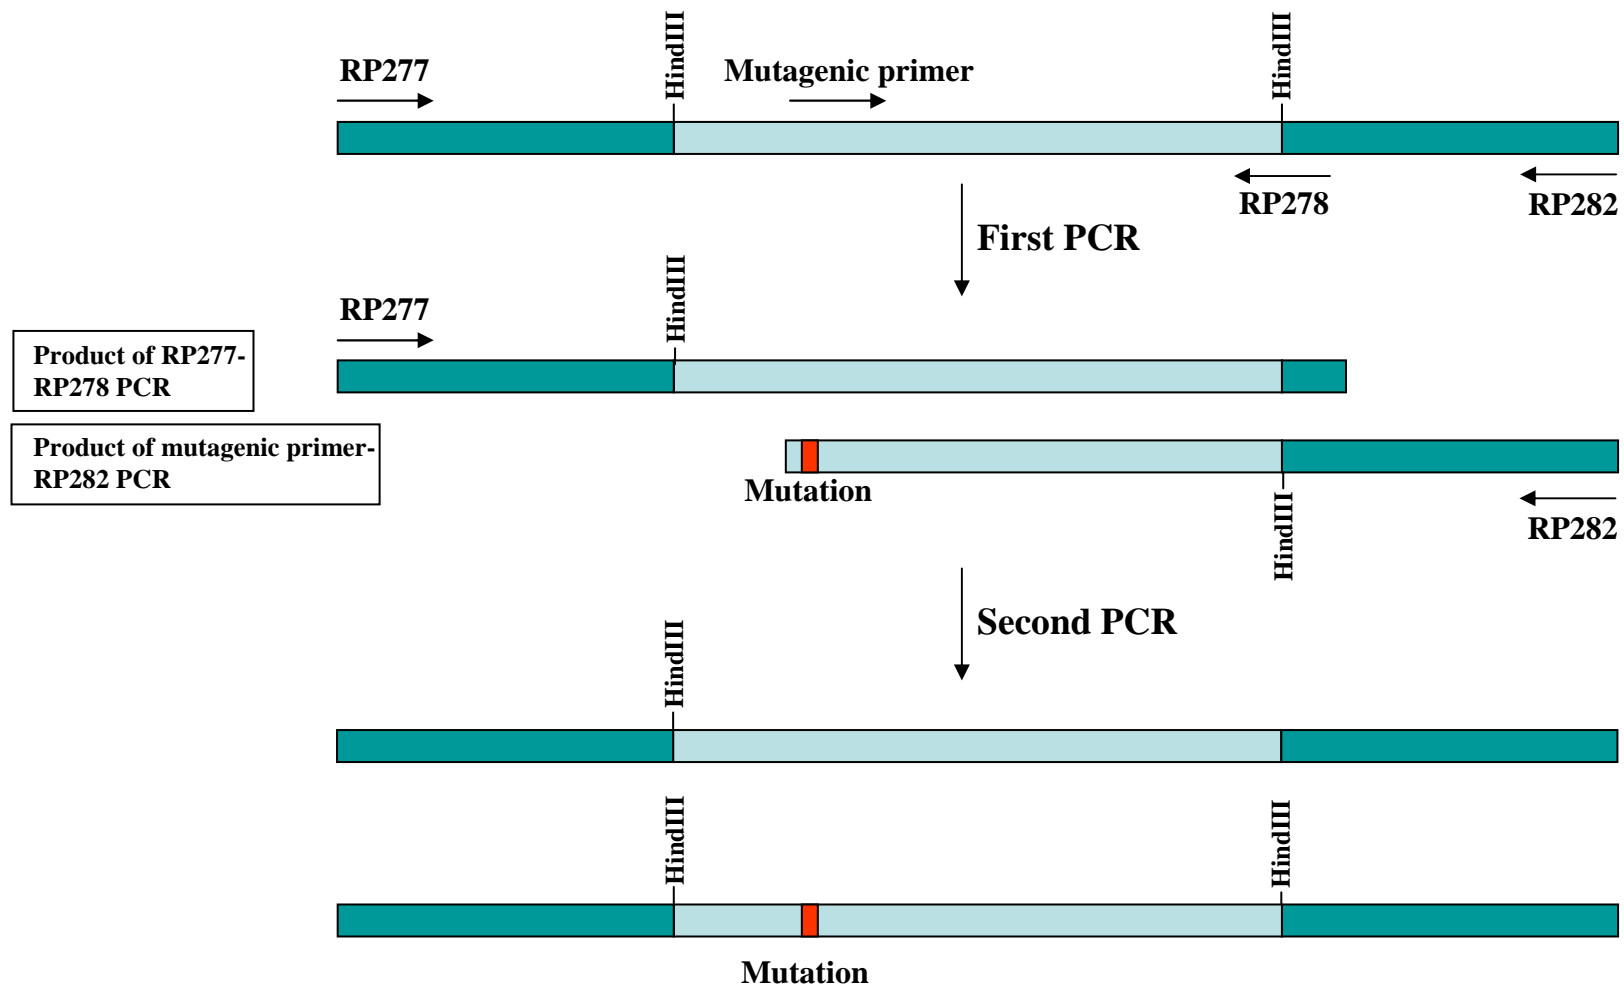

**Figure 1S.** Single nucleotide mutagenesis by overlap extension PCR (10) (see text for explanation).

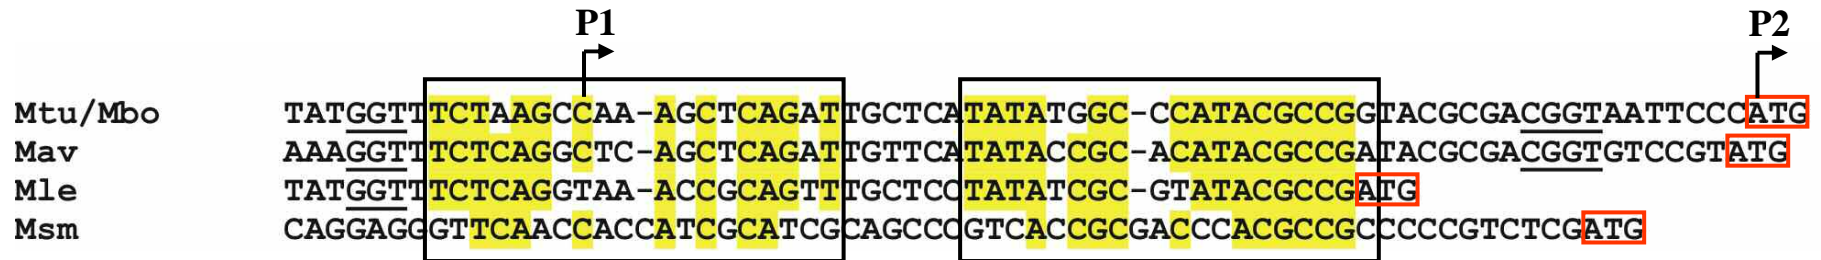

**Figure 2S.** Sequence of the *sigE* upstream region in *M. tuberculosis* (Mtb), *M. bovis* (Mbo), *M. avium* (Mav), *M. leprae* (Mle), and *M. smegmatis* (Msm). Putative MprA binding sites are boxed. Transcription initiation points of P1 and P2 are shown and their -10 are underlined. Nucleotides conserved in at least three out of the four sequences are marked in yellow. Putative translation start points are red boxed.
