# Supplementary material
Source: PubMed Central journal article supplement (PMC2519537)
Supplement: supp_190_17_5963__2.pdf [file supp_190_17_5963__2.pdf]

**Table 1S. Primers used in this study**

| Primer                                                     | Sequence                                                                         | Purpose                                                          |
|------------------------------------------------------------|----------------------------------------------------------------------------------|------------------------------------------------------------------|
| <b>Two-hybrid system</b>                                   |                                                                                  |                                                                  |
| RP50                                                       | TTGGTACCCGACGTACCCGCGATTGCC                                                      | Amplification of <i>rseA</i> (up)                                |
| RP51                                                       | AATCTAGATATGGCTGACCCCGGAAGCGTG                                                   | Amplification of <i>rseA</i> (lo)                                |
| RP775                                                      | AAGCTTGATGGAACCTCTCGGCGGACC                                                      | Amplification of <i>sigE<sub>257</sub></i> (up)                  |
| RP777                                                      | AAGCTTGAGTCCGACCAGCATGTCTCAT                                                     | Amplification of <i>sigE<sub>215</sub></i> (up)                  |
| RP776                                                      | TCTAGAGTGCGAACTGGGTTGACGTGAACT                                                   | Amplification of <i>sigE<sub>257-215</sub></i> (lo)              |
| <b>RT-PCR</b>                                              |                                                                                  |                                                                  |
| RP128                                                      | ACGACTTGCCAACTTATTGCAG                                                           | Couple c, Fig. 2A (up)                                           |
| RP129                                                      | TCAGACGGCTCCACCCACT                                                              | Couple c, Fig. 2A (lo)                                           |
| RP209                                                      | TTTGCGTTGCCGACGGTGAC                                                             | Couple b, Fig. 2A (up)                                           |
| RP210                                                      | GCGGACCTGTTGGGGATGAG                                                             | Couple b and a Fig. 2A (lo)                                      |
| RP218                                                      | CGGTACGCGACGGTAATTCC                                                             | Couple a, Fig. 2A (up)                                           |
| <b>5' RACE</b>                                             |                                                                                  |                                                                  |
| RP226                                                      | CCAGCTCATCCCAGGACG                                                               | RT reaction (I)                                                  |
| RP130                                                      | CCCCGGTGGCGTCGAATA                                                               | First amplification (sp2) (I)                                    |
| RP225                                                      | CCTGCAATTGGTCAGACGGC                                                             | Second amplification (sp3) (I)                                   |
| RP124                                                      | GGTCGTGATATTGAGATCCTCCGAATTT                                                     | RT reaction (II)                                                 |
| RP245                                                      | CGCCGAGGAGTTCCATGG                                                               | First amplification (sp2) (II)                                   |
| RP246                                                      | GGAATTACCGTCGCGTAC                                                               | Second amplification (sp3) (II)                                  |
| <b>Translational fusions/Single nucleotide mutagenesis</b> |                                                                                  |                                                                  |
| RP120                                                      | <u>AAGCTT</u> CCGCCTTGCCTCCGCTGAGCTT                                             | Upper primer for constructs shown in Fig. 6A, B (1), and C (1-6) |
| RP121                                                      | <u>AAGCTT</u> CCGCCGAGGAGTCCAGTGGA                                               | Lower primer for construct shown in Fig. 6A                      |
| RP217                                                      | <u>AAGCTT</u> AGCTCATCCCAGGACGGCAT                                               | Lower primer for construct 1 shown in Fig. 6B                    |
| RP277                                                      | GATCTTTGTGGATGACCTTTAATAGATTATA                                                  | Mutagenesis, common primer 1                                     |
| RP282                                                      | CAAAAATAATTCGCGTCTGGCCTTCCTGT                                                    | Mutagenesis, common primer 2                                     |
| RP278                                                      | ATCGAATCTTAGCTCATCCCAGGACGGCA                                                    | Mutagenesis, common primer 3                                     |
| RP279                                                      | GACGGTAATTCCCA <b>TC</b> <sub>i</sub> GAACCTCTCGGCGG                             | Mutagenic primer (Fig. 6, B 2)                                   |
| RP281                                                      | GGACAAGGCCACCA <b>TT</b> CCGTCCTGGGATGAG                                         | Mutagenic primer (Fig. 6, B 3)                                   |
| RP289                                                      | GAGTCCGACCAGCA <b>TCT</b> TCTCATCCCCAACAG                                        | Mutagenic primer (Fig. 6, B 4)                                   |
| RP280                                                      | GAGTCCGACCAGCA <b>TC</b> <sub>c</sub> TCTCATCCCCAACAG                            | Mutagenic primer (Fig. 6, B 5)                                   |
| RP406                                                      | <u>AAGCTT</u> CTGGTCCGACTCAAGGTCGTGATGGT                                         | Lower primer for construct 1 Fig. 6C                             |
| RP460                                                      | <u>AAGCTT</u> CTGGTCCGACTCAAGGTCGT <b>t</b> GATGGT <b>CGT</b> GATA<br>TT         | Lower primer for construct 2 Fig. 6C                             |
| RP461                                                      | <u>AAGCTT</u> CTGGTCCGACTCAAGGTCGTGATGGT <b>CGT</b> <b>t</b> GATA<br>TT          | Lower primer for construct 3 Fig. 6C                             |
| RP589                                                      | <u>AAGCTT</u> CTGGTCCGACT <b>t</b> CAAGGTCGTGATGGT <b>CGT</b> GATA<br>TT         | Lower primer for construct 4 Fig. 6C                             |
| RP407                                                      | <u>AAGCTT</u> CTGGTCCGACT <b>TC</b> GGGTCGTGATGGT                                | Lower primer for construct 5 Fig. 6C                             |
| RP590                                                      | <u>AAGCTT</u> CTGGTCCGACT <b>TA</b> AGGTCGT <b>TAT</b> GGT <b>CGT</b> GATA<br>TT | Lower primer for construct 6 Fig. 6C                             |

HindIII restriction sites are underlined, mutated codons are shown in bold, and nucleotides added to produce frameshift mutations are shown in small letters.
